# Supplementary material for: A Novel Interaction Between RAD23A/B and Y-family DNA Polymerases
Source: PubMed Central journal article supplement — J Mol Biol. Author manuscript; Available in PMC 2024 Feb 5. (PMC10842004; doi:10.1016/j.jmb.2023.168353), 2023-11-05
Supplement: NIHMS1944724-supplement-MMC2.pdf [file NIHMS1944724-supplement-MMC2.pdf]

Supplemental Information for:

**A novel interaction between RAD23A/B and Y-family DNA polymerases**

Nicholas W. Ashton<sup>1†‡</sup>, Nancy Jaiswal<sup>2‡§</sup>, Natália Cestari Moreno<sup>1</sup>, Irina V. Semenova<sup>2</sup>, Dana A. D'Orlando<sup>1¶</sup>, Marcela Teatin Latancia<sup>1</sup>, Justyna McIntyre<sup>1||</sup>, Roger Woodgate<sup>1\*</sup>, Irina Bezsonova<sup>2\*</sup>

<sup>1</sup> Laboratory of Genomic Integrity, National Institute of Child Health and Human Development, National Institutes of Health, 9800 Medical Center Drive, Bethesda, MD 20892-3371, USA

<sup>2</sup> Department of Molecular Biology and Biophysics, UConn Health, Farmington, CT 06032, USA

\* Correspondence should be addressed to:

Roger Woodgate. Tel: +1 301-435-0740, Email: woodgate@mail.nih.gov

Irina Bezsonova. Tel: +1 860-679-2769, Email: bezsonova@uchc.edu

† The authors wish it to be known that, in their opinion, the first two authors should be regarded as joint First Authors.

**This document includes:**

Figures S1 to S5

References for Supplemental Information

Legend for Dataset S1

Present affiliations:

‡ Department of Radiation Oncology, Dana-Farber Cancer Institute, Boston, MA 02215, USA

§ Department of Pathology and Laboratory Medicine, Indiana University School of Medicine, Indianapolis, IN 46202, USA

¥ Arbor Biotechnologies, 20 Acorn Park Dr. Cambridge, MA 02140

|| Institute of Biochemistry and Biophysics, Polish Academy of Sciences, ul. Pawinskiego 5A, 02-106, Warsaw, Poland

# Supplemental Figures

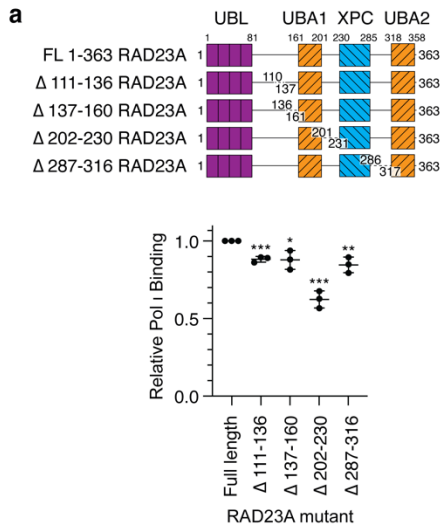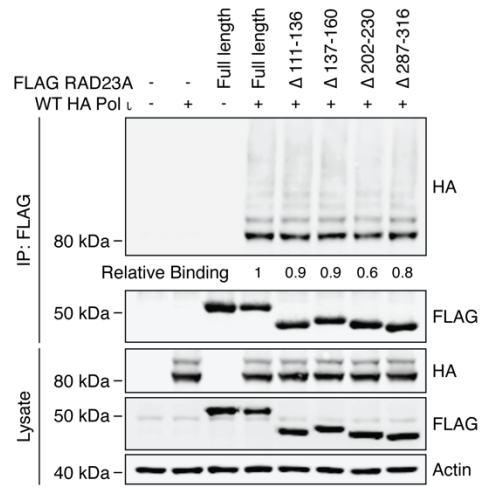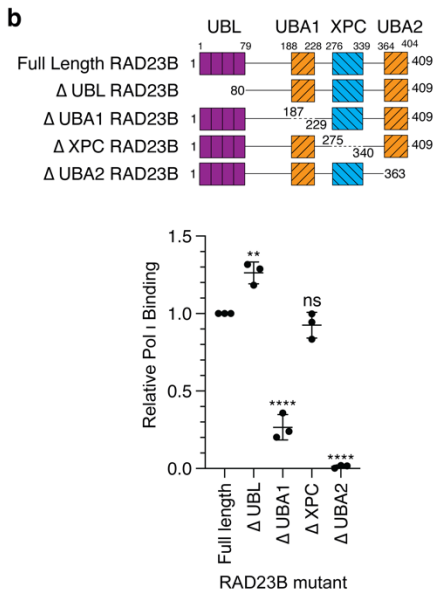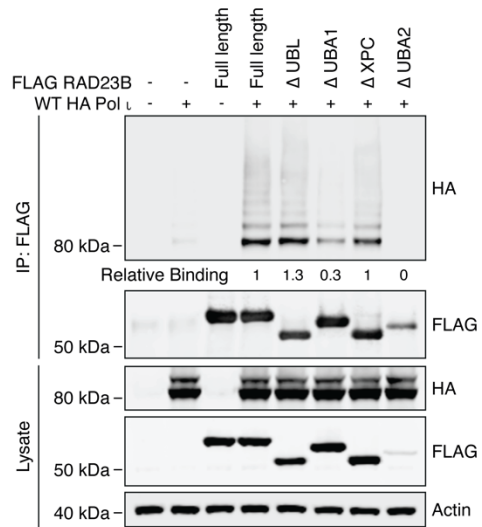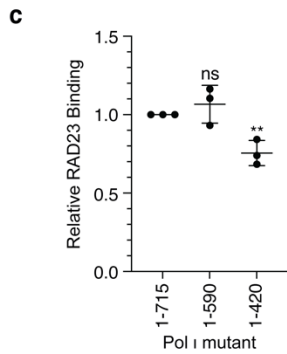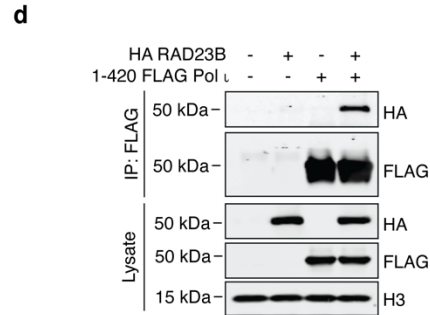

**Supplemental Figure 1: UBA1 and UBA2 of the RAD23 proteins mediate an association with the catalytic domain of Pol  $\iota$ .** (a - b) The schematics represent FLAG-tagged RAD23A (above) and RAD23B (below) mutants used here. These mutants were immunoprecipitated from 293T cells co-expressing WT HA Pol  $\iota$ . Eluent and whole cell lysate were immunoblotted as indicated. Relative binding was calculated based on the ratio of HA to FLAG proteins in the eluent. The bar graphs represent the quantification of relative binding from three repeats. Error bars represent standard deviation. Unpaired t-tests were used to assess whether there is a statistically significant difference in binding of Pol  $\iota$  with the RAD23 mutants compared with the WT. ns = not significant, \* =  $p < 0.05$ , \*\* =  $p < 0.01$ , \*\*\* =  $p < 0.001$ , \*\*\*\* =  $p < 0.0001$ . (c) Bar graph representing the quantification of relative binding from three repeats of Figure 1c. Error bars represent standard deviation. Unpaired t-tests were performed as in (b). (d) Immunoprecipitation of 1-420 FLAG Pol  $\iota$  from 293T cells co-expressing WT HA RAD23B. Eluent and WCL (input) were immunoblotted as indicated.



**a**

|             |     |                                              |      |      |  |
|-------------|-----|----------------------------------------------|------|------|--|
|             |     | S172 M173                                    |      | V195 |  |
| RAD23A UBA1 | 161 | - SEYETMLTEIMSMGYERERVVAALRASYNPHRAVVEYLLTG  | -    | 201  |  |
|             |     | .     :                 :     :              |      |      |  |
| RAD23B UBA1 | 188 | - QSYENMVTEIMSMGYEREQVIAALRASFNNDRAVVEYLLMG  | -    | 228  |  |
|             |     | S199 M200                                    |      | V222 |  |
|             |     |                                              |      |      |  |
|             |     |                                              | C344 | F354 |  |
| RAD23A UBA2 | 318 | - PQEKEAIERLKALGFPESELVIQAYFACCKNENLAANFLLSQ | -    | 358  |  |
|             |     |                                              |      |      |  |
| RAD23B UBA2 | 364 | - PQEKEAIERLKALGFPEGLVIQAYFACCKNENLAANFLLOQ  | -    | 404  |  |
|             |     |                                              | C390 | F400 |  |

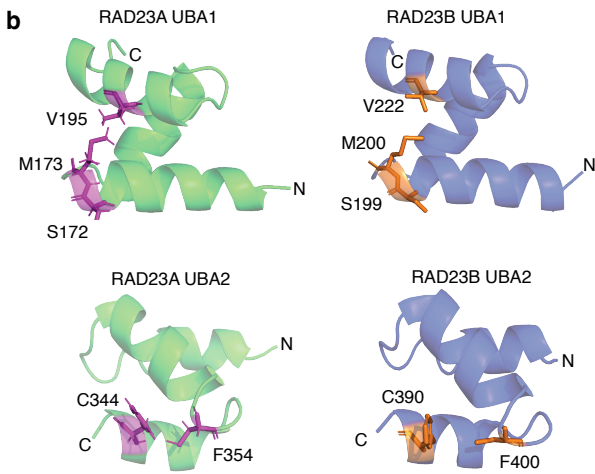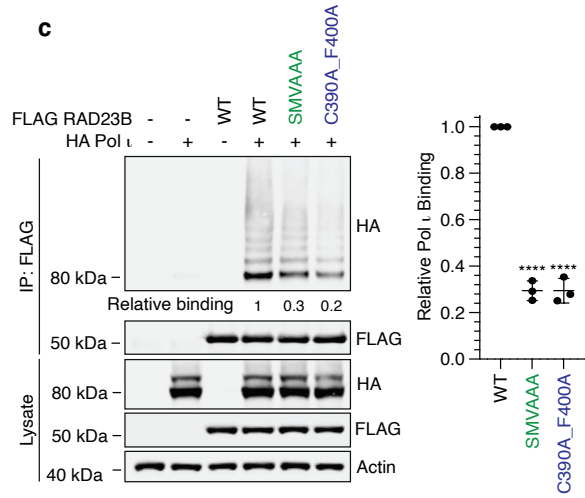

**Supplemental Figure 3: Point mutations in UBA1 and UBA2 of RAD23B disrupt binding to Pol  $\iota$ .** (a) Alignment of the amino acid sequences of UBA1 and UBA2 from RAD23A and RAD23B. Residues highlighted for UBA1 and UBA2 are those determined in Figure 4a as affecting the binding of Pol  $\iota$  to RAD23A. (b) Ribbon structures of the RAD23A and RAD23B UBA1 and UBA2 domains, illustrating the position of amino acids highlighted in (a). The structures of RAD23A UBA1 [1] (PDB:1IFY) and UBA2 [2] (PDB:1DV0) were previously determined by solution NMR. The RAD23B structures are predictions generated by AlphaFold and available from the AlphaFold Protein Structure Database (available: <https://alphafold.ebi.ac.uk/entry/P54727>) [3, 4]. (c) Immunoprecipitation of the indicated RAD23B truncations from 293T cells co-expressing WT HA Pol  $\iota$ . Eluent and WCL (input) were immunoblotted as indicated. Relative binding was calculated based on the ratio of HA to FLAG proteins in the eluent. The bar graph representing the quantification of relative binding from three repeats. Error bars represent standard deviation. Unpaired t-tests were used to assess differences in binding of Pol  $\iota$  with WT vs mutant RAD23B WT. \*\*\*\* =  $p < 0.001$ .

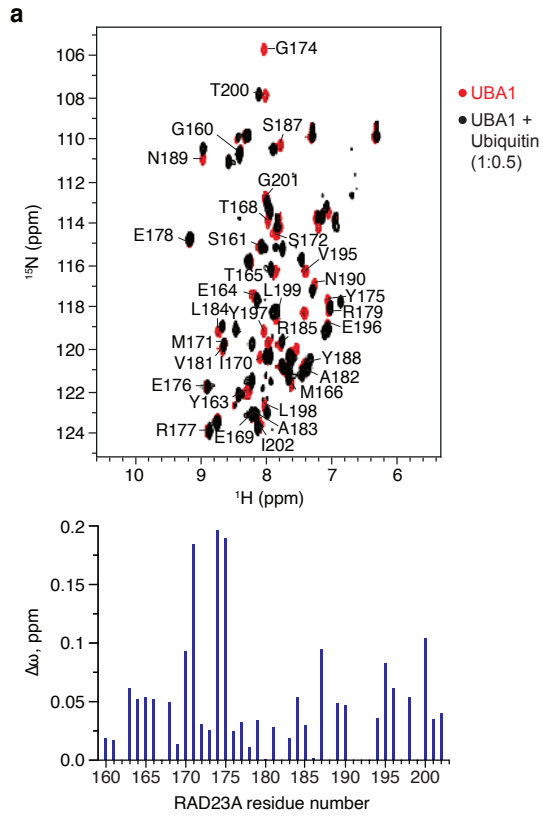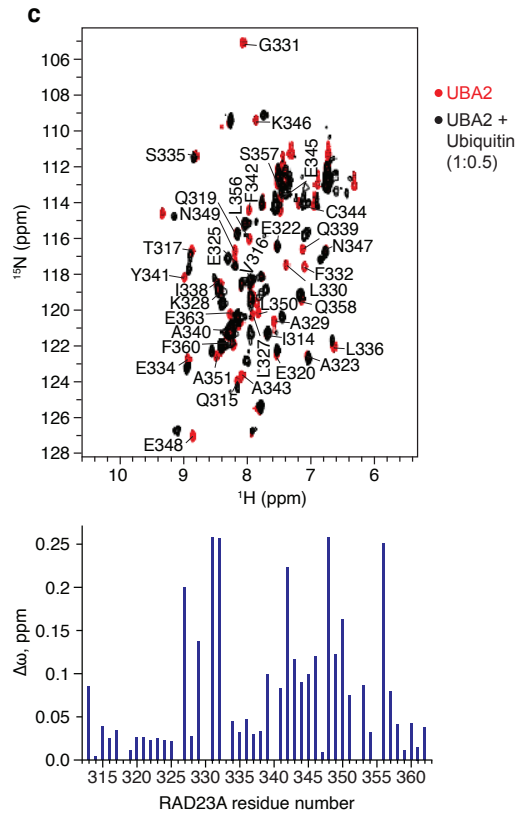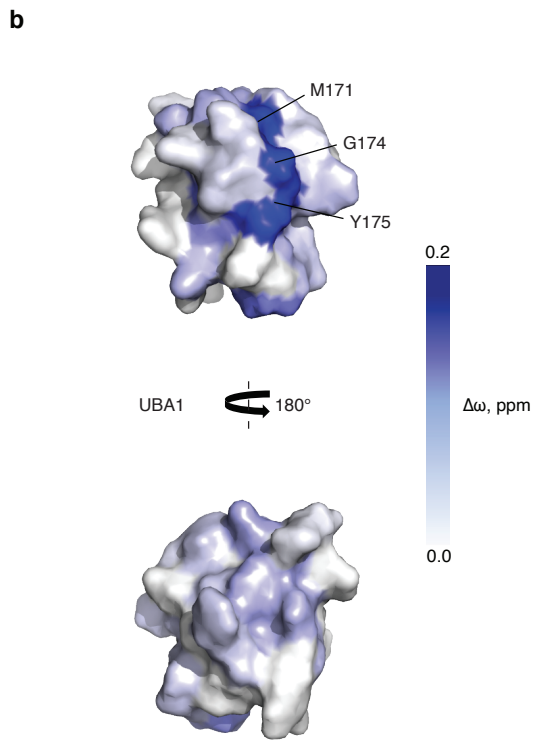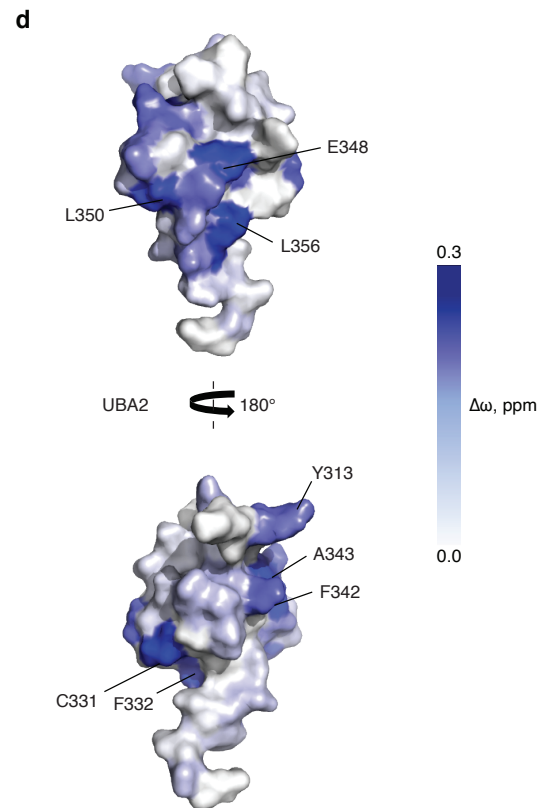



**Supplemental Figure 4: UBA1 and UBA2 interact directly with ubiquitin (a - b)** 1H-15N HSQC spectrum of UBA1 (a) and UBA2 (b) when titrated with ubiquitin. Free and bound spectra have been shown in red and black, respectively. Per-residue CSPs ( $\Delta\omega$ ) due to ubiquitin binding were quantified and represented as bar plots. (c - d) Surface representation of the RAD23A UBA (c) and UBA2 (d) domains. CSPs from NMR experiments were used to map the binding interface, shown in blue.

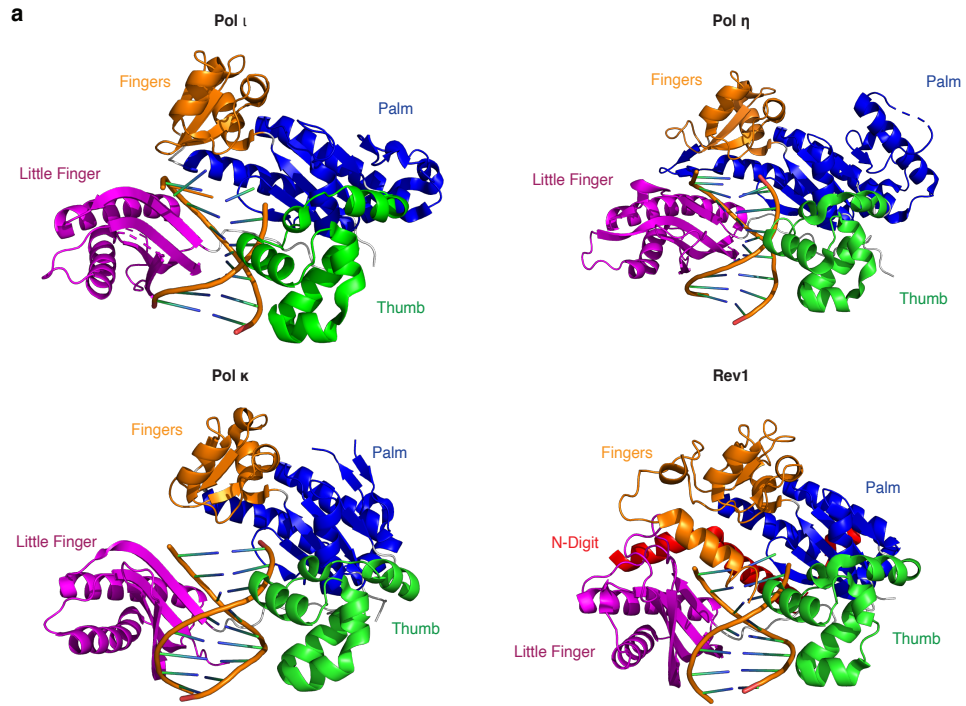

**b**

|                       |   |   |   |   |   |   |   |   |   |
|-----------------------|---|---|---|---|---|---|---|---|---|
| 1-420 HA Pol $\iota$  | - | + | - | - | - | - | + | - | - |
| 1-449 HA Pol $\eta$   | - | - | + | - | - | - | - | + | - |
| 1-542 HA Pol $\kappa$ | - | - | - | + | - | - | - | - | + |
| 321-843 HA Rev1       | - | - | - | - | + | - | - | - | - |
| WT FLAG RAD23B        | - | - | - | - | - | + | + | + | + |

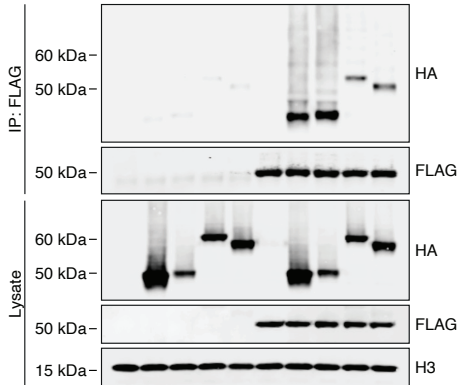

**Supplemental Figure 5. RAD23A and RAD23B binding the catalytic domains of each human Y-family DNA polymerases.** (a) Ribbon illustrations of the crystal structures of the Pol  $\iota$  (PDB:3GV8) [5], Pol  $\eta$  (PDB:4J9K) [6], Pol  $\kappa$  (PDB:6CST) [7] and REV1 (PDB:3GQC) [8] catalytic domains. Colors highlight the fingers, palm, thumb, and little finger sub-domains. (b) Immunoprecipitation of WT FLAG RAD23B from 293T cells co-expressing HA-tagged catalytic domains of Pol  $\iota$ , Pol  $\eta$ , Pol  $\kappa$  and Rev1. Eluent and WCL (input) were immunoblotted as indicated.

## Dataset 1 (separate file)

**A dataset of proteins for which statistically significant differences in signal intensity were observed between Pol  $\iota$  and control treated ProtoArray microarrays.** ProtoArrays were incubated with WT FLAG Pol  $\iota$ , or a control solution, for 1 hour. Arrays were then washed and incubated with mouse anti-Pol  $\iota$  primary antibodies, washed again, and incubated with Alexa647-conjugated anti-Mouse secondary antibodies. After a final wash, arrays were scanned, and fluorescent signal intensity quantitated. Magnitude change was calculated as  $\log(\text{SNR})_{\text{Pol } \iota\text{-treated}} - \log(\text{SNR})_{\text{control}}$  to give an estimate of magnitude change. Data from the 2211 proteins for which statistically significant differences in signal intensity were observed are presented here.

## References

- [1] Mueller TD, Feigon J. (2002). Solution structures of UBA domains reveal a conserved hydrophobic surface for protein-protein interactions. *J Mol Biol.* **319**, 1243-1255.
- [2] Withers-Ward ES, Mueller TD, Chen IS, Feigon J. (2000). Biochemical and structural analysis of the interaction between the UBA(2) domain of the DNA repair protein HHR23A and HIV-1 Vpr. *Biochemistry.* **39**, 14103-14112.
- [3] Jumper J, Evans R, Pritzel A, Green T, Figurnov M, Ronneberger O, Tunyasuvunakool K, Bates R, Zidek A, Potapenko A, Bridgland A, Meyer C, Kohl SAA, Ballard AJ, Cowie A, Romera-Paredes B, Nikolov S, Jain R, Adler J, Back T, Petersen S, Reiman D, Clancy E, Zielinski M, Steinegger M, Pacholska M, Berghammer T, Bodenstein S, Silver D, Vinyals O, Senior AW, Kavukcuoglu K, Kohli P, Hassabis D. (2021). Highly accurate protein structure prediction with AlphaFold. *Nature.* **596**, 583-589.
- [4] Varadi M, Anyango S, Deshpande M, Nair S, Natassia C, Yordanova G, Yuan D, Stroe O, Wood G, Laydon A, Zidek A, Green T, Tunyasuvunakool K, Petersen S, Jumper J, Clancy E,

Green R, Vora A, Lutfi M, Figurnov M, Cowie A, Hobbs N, Kohli P, Kleywegt G, Birney E, Hassabis D, Velankar S. (2022). AlphaFold Protein Structure Database: massively expanding the structural coverage of protein-sequence space with high-accuracy models. *Nucleic Acids Res.* **50**, D439-D444.

[5] Kirouac KN, Ling H. (2009). Structural basis of error-prone replication and stalling at a thymine base by human DNA polymerase  $\iota$ . *EMBO J.* **28**, 1644-1654.

[6] Zhao Y, Gregory MT, Biertumpfel C, Hua YJ, Hanaoka F, Yang W. (2013). Mechanism of somatic hypermutation at the WA motif by human DNA polymerase  $\eta$ . *Proc Natl Acad Sci U S A.* **110**, 8146-8151.

[7] Jha V, Ling H. (2018). 2.0 Å resolution crystal structure of human polk reveals a new catalytic function of N-clasp in DNA replication. *Sci Rep.* **8**, 15125.

[8] Swan MK, Johnson RE, Prakash L, Prakash S, Aggarwal AK. (2009). Structure of the human Rev1-DNA-dNTP ternary complex. *J Mol Biol.* **390**, 699-709.
